# Supplementary material for: multiHiCcompare: joint normalization and comparative analysis of complex Hi-C experiments
Source: Oxford University Press journal article supplement (doi:10.1093/bioinformatics/btz048), 2019-01-17
Supplement: bioinformatics_35_17_2916_s4.docx [file bioinformatics_35_17_2916_s4.docx]

# Supplemental Methods

## Cyclic Loess normalization

Here, we adapt our method to normalizing multiple Hi-C datasets, a procedure termed “cyclic loess” (Ballman et al., 2004). The cyclic loess algorithm proceeds through the following steps:

1. Choose two out of the N total samples then generate an MD plot.
2. Fit a loess curve to the MD plot.
3. Subtract from the first dataset and add to the second.
4. Repeat until all unique pairs have been compared.
5. Repeat until convergence.

Cyclic loess typically requires two to three iterations for convergence, which is reached when the fitted values stop changing (Ballman et al., 2004). The order in which pairs are selected may negligibly affect the speed of convergence; however, there should be no effect on normalization results (Ballman et al., 2004).

Cyclic loess is computationally intensive; however, it naturally lends itself to parallelization. If a parallelization option is specified, normalization for each chromosome is distributed to a different processor. multiHiCcompare makes use of the BiocParallel parallelization methods.

## Adaptation of differential detection statistics for Hi-C data

To detect chromatin interaction differences between multiple Hi-C datasets, we define as an experimental condition for which replicated Hi-C datasets were produced. The goal is to identify differential chromatin interactions between condition vs. condition . The IF value for a specific interacting pair of regions, , at distance pool, , from sample will be denoted , where is the total number of reads in sample at distance pool , is the proportion of interaction counts in sample from experimental condition , and is the dispersion. The NB distribution can be parameterized with the mean and variance (M. D. Robinson, McCarthy, and Smyth 2010). Dividing by obtains the total coefficient of variation It follows that the biological CV is . For difference detection, the parameters of interest are and .

The easiest way to obtain the NB variance parameter is to estimate it globally across all distance-specific interaction frequencies, i.e., set (M. D. Robinson and Smyth 2008; Anders and Huber 2010; Hansen et al. 2011). The common dispersion can be estimated through the maximizing the likelihood function , where is the number of interaction counts at a given distance pool . Intuitively, it allows for prioritizing interaction frequencies that behave consistently across replicates, hence representing the more reliable measures. This approach works well when the number of replicates is small (M. D. Robinson and Smyth 2007; Kal et al. 1999), as will be the case in most Hi-C experiments. An extension of this simplified approach is to consider the dependence between the variance function and the mean of IFs, so that all IFs with the same expected count have the same variance. Frequency-specific dispersions can then be estimated using an empirical Bayes approach using the quasi-likelihood (Baggerly et al. 2004; Tjur 1998), weighted likelihood (M. D. Robinson and Smyth 2007) or Cox–Reid adjusted profile likelihood (McCarthy, Chen, and Smyth 2012), to be then used for moderation of outlier variances.

To test for differences in chromatin interactions between two cellular conditions a likelihood ratio test can be used. We are primarily interested in testing the null hypothesis . The expense and sequencing depth required for generating Hi-C data means that the number of replicates for each condition will typically be very small. Thus, we estimate the common dispersion at distance pool , , as described (M. D. Robinson and Smyth 2008; Anders and Huber 2010; Hansen et al. 2011). Using the estimated common dispersion for a distance pool , we can then perform an exact test similar to Fisher’s exact test (M. D. Robinson and Smyth 2008). The cyclic loess normalization will allow the IFs for interacting pairs to be treated as identically distributed negative binomial random variables. For each pairwise interaction , at a distance pool , we can calculate the total sum of experimental groups and compare it to the group-wise totals to calculate a 2-sided p-value.

To analyze data from more complex experimental designs (three or more groups, covariates), generalized linear models (GLMs) have been extensively used for differential analysis of non-normally distributed count data (Tjur 1998; Baggerly et al. 2004; Lu, Tomfohr, and Kepler 2005; Auer and Doerge 2010; Anders and Huber 2010; McCarthy, Chen, and Smyth 2012; M. D. Robinson, McCarthy, and Smyth 2010). Assuming that an estimate is available for , so the variance can be calculated for any , the vector of covariates (e.g., experimental condition assignment) can be linked with through a log-linear model , where is a vector of regression coefficients by which the covariate effects are mediated for interaction frequency , and is a log-transformed total number of reads in sample at distance that accounts for sequencing depth variability. can be estimated as , where is the design matrix with columns and . Importantly, for Hi-C replicates generated using different enzymes the design matrix may contain a covariate column for an enzyme, naturally accounting for the variability introduced through differences in DNA digestion. The GLM framework was implemented into multiHiCcompare and can be used to detect differential interactions from replicated Hi-C data.

## Comparison with FIND

To compare the performance of multiHiCcompare with that of FIND, we used FIND’s generateSimulation() simulation function to generate datasets with varying numbers of replicates for two conditions. A 300x300 Hi-C contact map with a 0.002 probability of differential interactions at fold changes of 3, 5, and 10 were generated for each replicate. Differential chromatin interactions detected by FIND and multiHiCcompare were compared against the ground truth, and the ROC analysis and standard performance classifiers were assessed.

## Comparison with diffHic

To compare the performance of multiHiCcompare with that of diffHic, we performed an analysis of the Hi-C data used in the diffHic paper (Lun and Smyth, 2015). The data was from human prostate epithelial cells RWPE1 over-expressing the ERG protein or GFP protein, generated in replicates (Rickman et al., 2012) (Supplemental Table S1). The sequencing data was processed into BAM files using HiCUP (Wingett et al., 2015) and then converted to contact maps using juicer tools (Durand et al., 2016). The contact maps for the Hi-C libraries were then inputted into multiHiCcompare. The data were jointly normalized with cyclic loess, and the exact test was used to detect differences between the two conditions. The results of the multiHiCcompare analysis were then compared with those from the diffHic analysis.

## Comparison of auxin-treated vs. untreated Hi-C datasets

As a case example of multiHiCcompare, we performed a differential analysis of Hi-C data from (Rao et al., 2017). The data from HCT-116 colon carcinoma cell line had 7 samples from 2 biological sources for the untreated condition and 7 samples from 2 biological sources for the auxin treatment group (Supplemental Table S1). We jointly normalized all replicates using multiHiCcompare. We then input the data into the GLM framework to detect differences between the two conditions while controlling for the biological source. The regions that were detected as differentially interacting were assessed for enrichment in HCT-116-specific transcription factor binding sites (Supplemental Table S3).

## Analysis of CTCF depleted cells

As an additional example of the functionality of multiHiCcompare, we performed a differential analysis of Hi-C data from (Zuin et al., 2014) at 40KB resolution. The experiment was performed on HEK293 cells which had CTCF siRNA knockdowns compared to control cells. Two control samples and two CTCF knockdown samples (Supplemental Table S1) were normalized and compared using multiHiCcompare. The regions that were detected as differentially interacting were assessed for enrichment in HEK293 specific transcription factor binding sites (Supplemental Table S5).

# Supplemental Figures


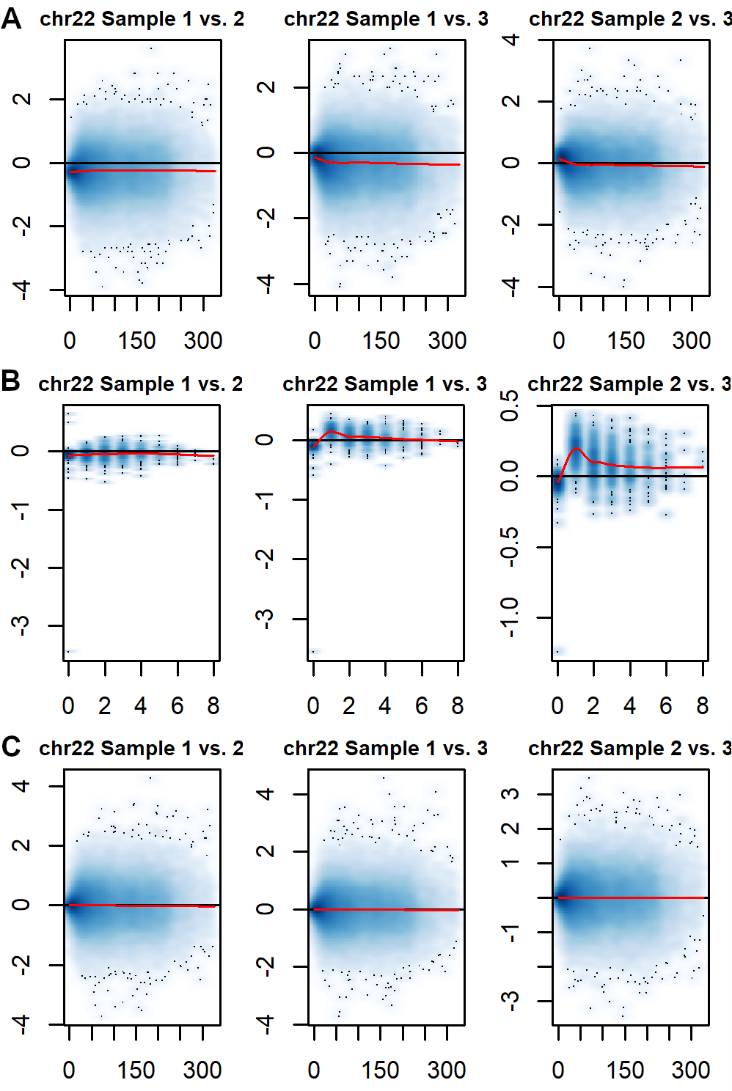


**Supplemental Figure S1**. MD plots for untreated HCT-116 replicates at 100KB resolution. A) Raw data, B) HiCNorm normalized data, and C) mutliHiCcompare fastlo normalized data. Red lines indicate loess fit to the data. HiCNorm is does not removed between dataset bias while the multiHiCcompare fastlo procedure can remove the between dataset bias. HiCNorm was designed to remove bias due to GC content, fragment size, and mappability however these factors are all very similar or the same between datasets (assuming the data is from the same genome) and do not pose much of an issue when the purpose of normalization is comparison. HiCNorm does not seem to be able to remove the between dataset technical biases that need to be removed for the purpose of comparison.

**Supplemental Figure S2.** Suitability of negative binomial distribution to fit distance-centric chromatin interaction frequencies at different distances, A) Distance = 10, B) Distance = 100, C) Distance = 1000; chromosomes, D) chr1, E) chr18, F) chr19, and resolutions G) 100KB, H) 50KB, I) 10KB. Red lines indicate the theoretical negative binomial distribution using the estimated parameters from the Hi-C data. Histogram bars represent real distribution of the IFs from the Hi-C data. Data for parts A) - F) are from GM12878 cell line (Suhas S P Rao et al. 2014) at 100KB resolution. Data for parts G) - I) are from HCT-116 cell line, chr1.


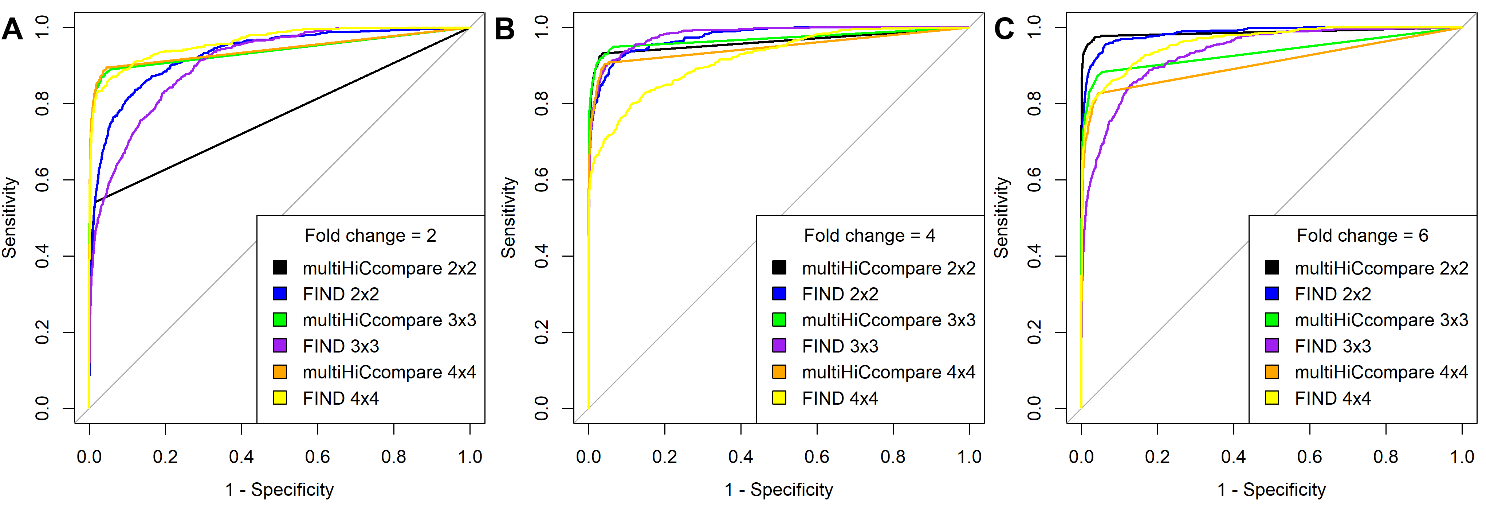


**Supplemental Figure S3.** ROC analysis for the comparison between multiHiCcompare and FIND over different fold changes and the number of replicates per group. Data were simulated using FIND’s simulation function for two conditions with varying numbers of replicates in each condition. Data were then inputted into a FIND and multiHiCcompare analysis and the results were compared with the true differences. A) Fold change = 2, B) fold change = 4, C) fold change = 6.


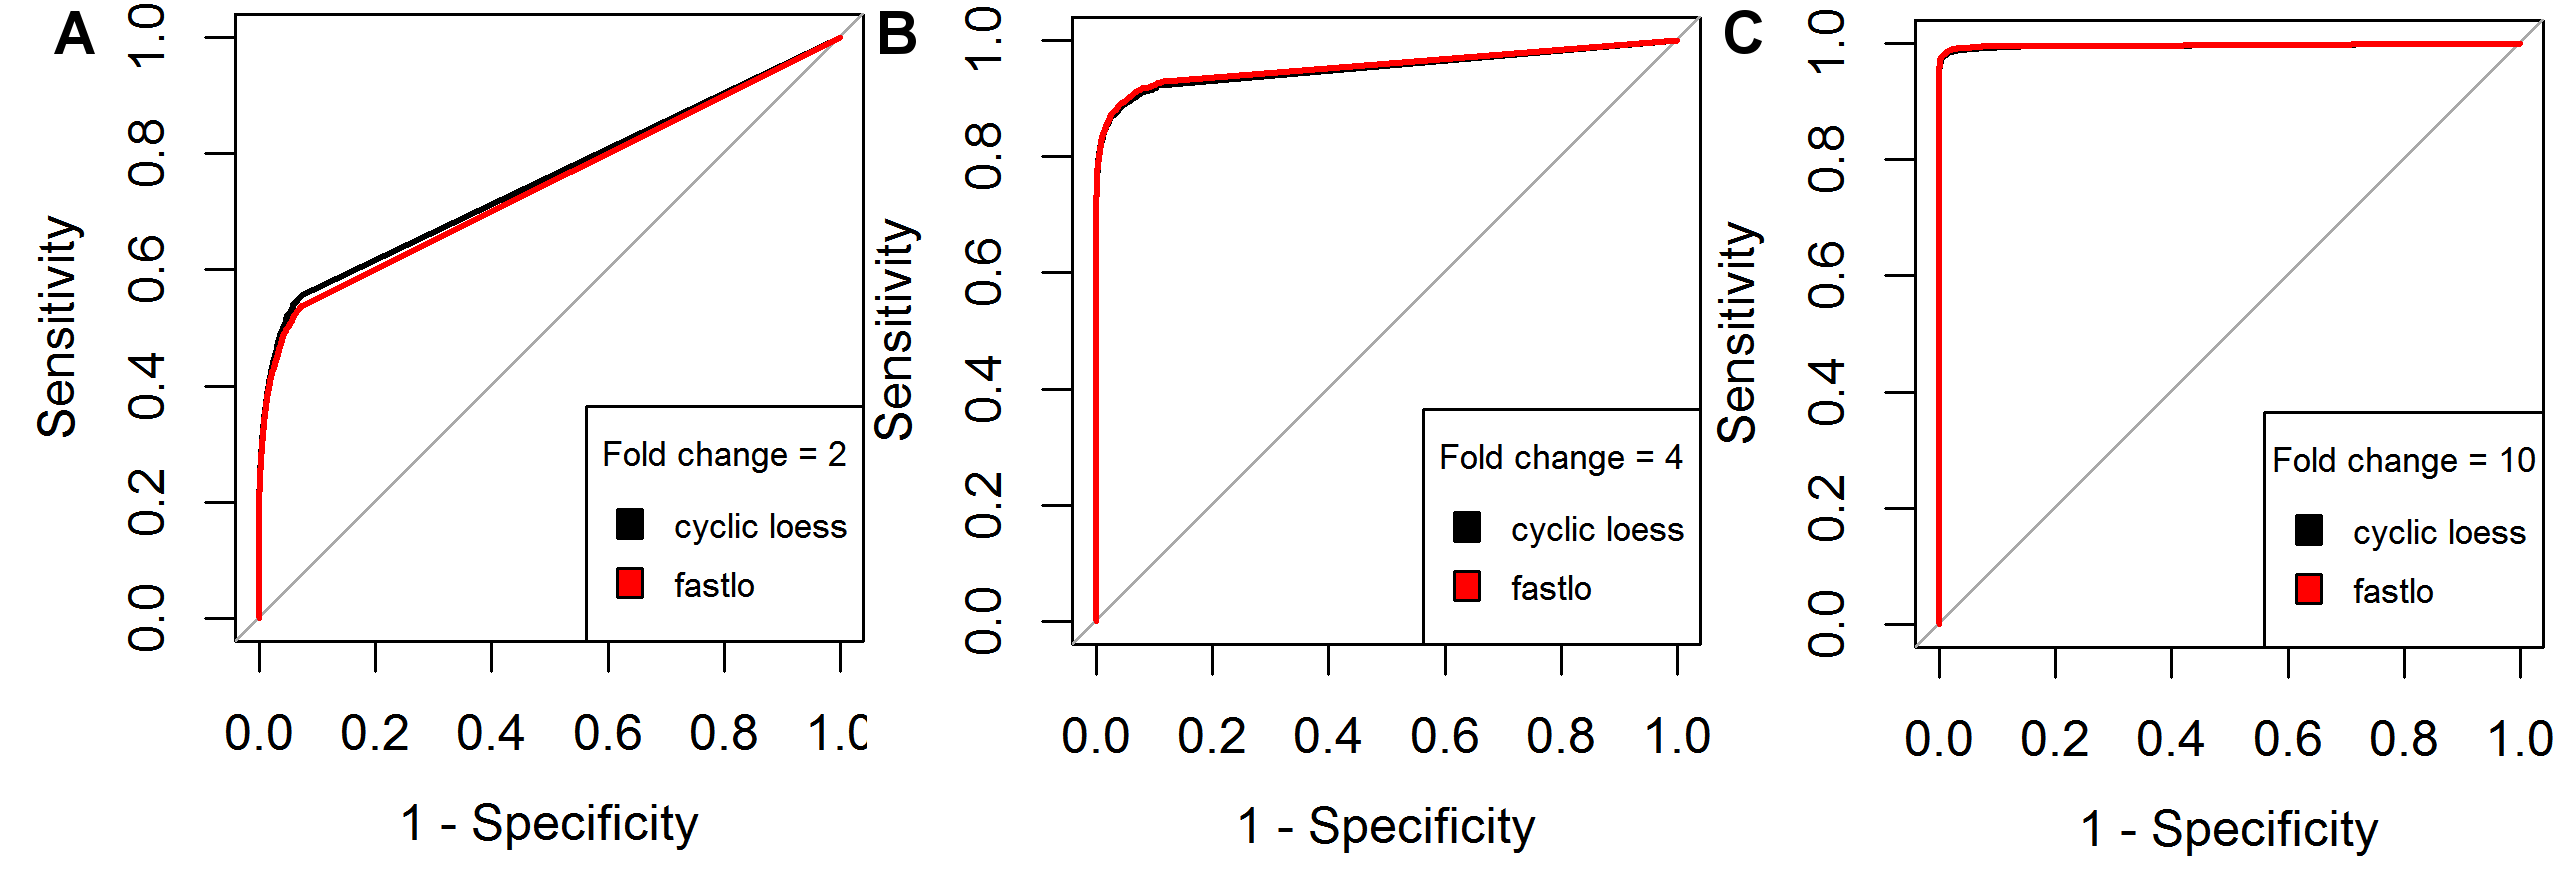


**Supplemental Figure S4.** ROC analysis for the comparison between cyclic loess and fastlo method. A)-C) ROC curves for the effect of each normalization method on difference detection at fold changes of A) 2, B) 4, C) 10. Analysis performed on data from HCT-116 cell line chromosome 1 at 100KB resolution using two replicates for each experimental condition (Suhas S. P. Rao et al. 2017). Data were normalized using multiHiCcompare’s cyclic loess or fastlo functions and then input into multiHiCcompare’s exact test. The ROC curves indicate that the normalization methods are about equivalent for the purpose of comparison.


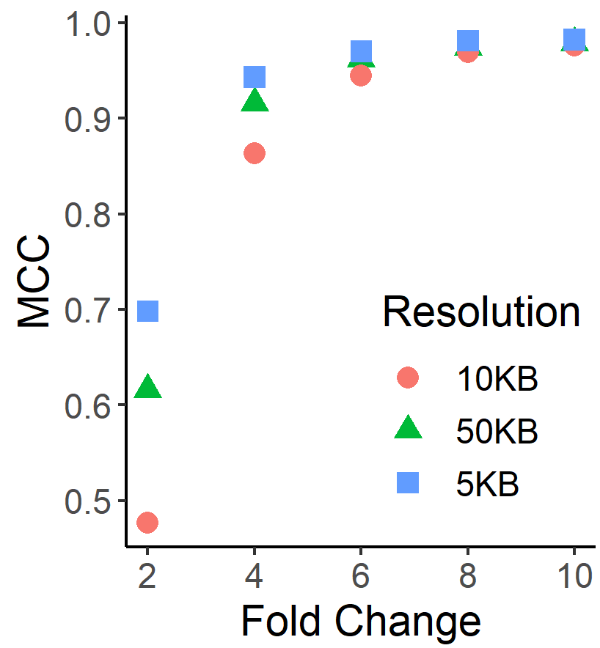


**Supplemental Figure S5.** Performance evaluation of multiHiCcompare over various resolutions. HCT-116 replicate data was used to perform 2x2 comparisons on the ability to detect added in true differences (see Methods). multiHiCcompare was found to be robust even at high resolution when detecting fold differences >= 4.


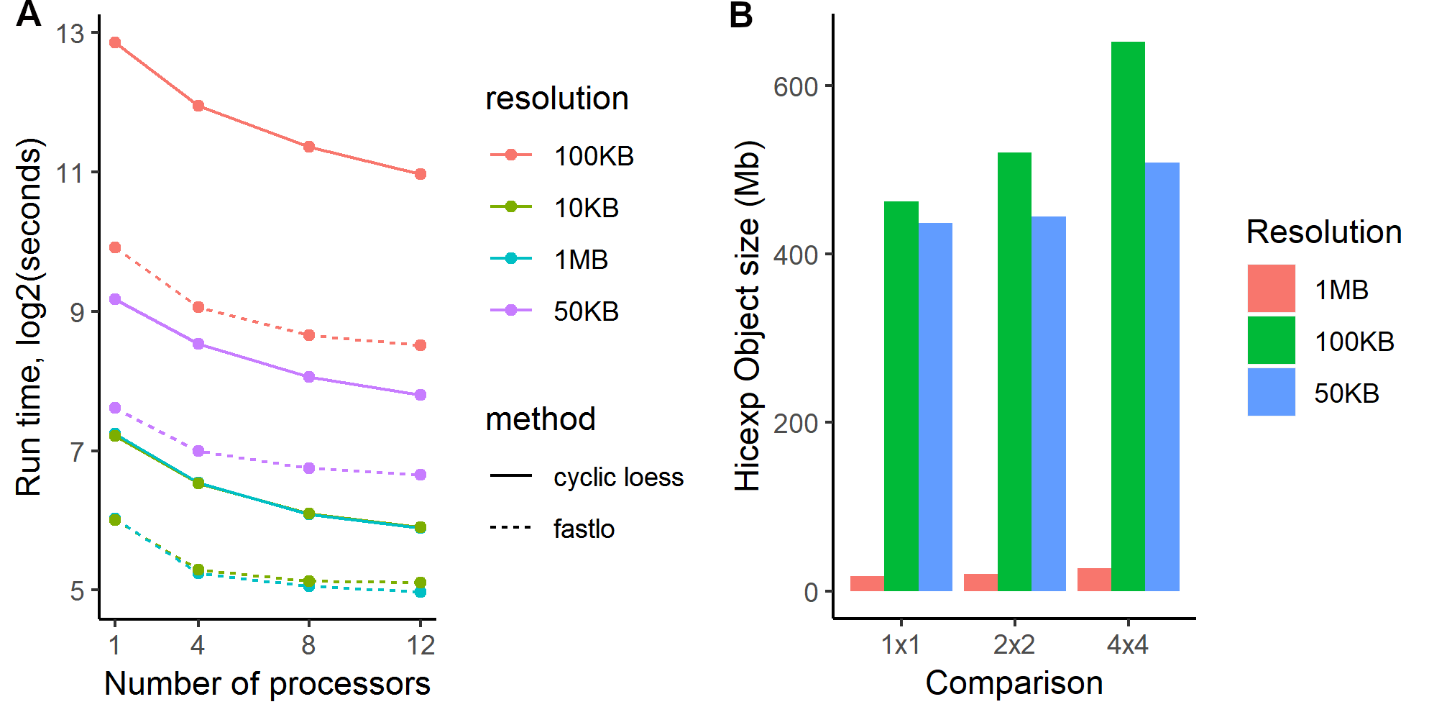


**Supplemental Figure S6.** A) Performance comparison between cyclic loess and fastlo normalization algorithms. The plot of computational runtime for cyclic loess and fastlo using various numbers of processors, over multiple resolutions of Hi-C data. Data used was from HCT-116 cell line (Suhas S. P. Rao et al. 2017) performing a comparison between two groups with a sample size of 2 per group on chromosomes 1-22. Run times include the normalization steps and the difference detection steps. B) Memory usage comparison for the Hicexp object used in multiHiCcompare. Comparison indicates the number of samples per group, memory usage shown in Megabytes. Data used was from HCT-116 cell line, chromosomes 1-22 (Suhas S. P. Rao et al. 2017).

# Supplemental Tables

**Supplemental Table S1.** Data sources used in multiHiCcompare analyses. “Library” - the Hi-C library name (hyperlink to sample on GEO); “Cell type”, “Condition” - the biological condition for the dataset.

| **Library** | **Cell type** | **Condition** |
| --- | --- | --- |
| [*Rao-2017-HIC001*](ftp://ftp.ncbi.nlm.nih.gov/geo/samples/GSM2795nnn/GSM2795535/suppl/GSM2795535_Rao-2017-HIC001_30.hic.gz) | HCT-116-RAD21-mAC | Normal; Biological Sample 1 |
| [*Rao-2017-HIC002*](ftp://ftp.ncbi.nlm.nih.gov/geo/samples/GSM2795nnn/GSM2795536/suppl/GSM2795536_Rao-2017-HIC002_30.hic.gz) | HCT-116-RAD21-mAC | Normal; Biological Sample 1 |
| [*Rao-2017-HIC003*](ftp://ftp.ncbi.nlm.nih.gov/geo/samples/GSM2795nnn/GSM2795537/suppl/GSM2795537_Rao-2017-HIC003_30.hic.gz) | HCT-116-RAD21-mAC | Normal; Biological Sample 1 |
| [*Rao-2017-HIC004*](ftp://ftp.ncbi.nlm.nih.gov/geo/samples/GSM2795nnn/GSM2795538/suppl/GSM2795538_Rao-2017-HIC004_30.hic.gz) | HCT-116-RAD21-mAC | Normal; Biological Sample 2 |
| [*Rao-2017-HIC005*](ftp://ftp.ncbi.nlm.nih.gov/geo/samples/GSM2795nnn/GSM2795539/suppl/GSM2795539_Rao-2017-HIC005_30.hic.gz) | HCT-116-RAD21-mAC | Normal; Biological Sample 2 |
| [*Rao-2017-HIC006*](ftp://ftp.ncbi.nlm.nih.gov/geo/samples/GSM2795nnn/GSM2795540/suppl/GSM2795540_Rao-2017-HIC006_30.hic.gz) | HCT-116-RAD21-mAC | Normal; Biological Sample 2 |
| [*Rao-2017-HIC007*](ftp://ftp.ncbi.nlm.nih.gov/geo/samples/GSM2809nnn/GSM2809538/suppl/GSM2809538_Rao-2017-HIC007_30.hic.gz) | HCT-116-RAD21-mAC | Normal; Biological Sample 2 |
| [*Rao-2017-HIC008*](ftp://ftp.ncbi.nlm.nih.gov/geo/samples/GSM2809nnn/GSM2809539/suppl/GSM2809539_Rao-2017-HIC008_30.hic.gz) | HCT-116-RAD21-mAC | Auxin; Biological Sample 1 |
| [*Rao-2017-HIC009*](ftp://ftp.ncbi.nlm.nih.gov/geo/samples/GSM2809nnn/GSM2809540/suppl/GSM2809540_Rao-2017-HIC009_30.hic.gz) | HCT-116-RAD21-mAC | Auxin; Biological Sample 1 |
| [*Rao-2017-HIC010*](ftp://ftp.ncbi.nlm.nih.gov/geo/samples/GSM2809nnn/GSM2809541/suppl/GSM2809541_Rao-2017-HIC010_30.hic.gz) | HCT-116-RAD21-mAC | Auxin; Biological Sample 1 |
| [*Rao-2017-HIC011*](ftp://ftp.ncbi.nlm.nih.gov/geo/samples/GSM2809nnn/GSM2809542/suppl/GSM2809542_Rao-2017-HIC011_30.hic.gz) | HCT-116-RAD21-mAC | Auxin; Biological Sample 2 |
| [*Rao-2017-HIC012*](ftp://ftp.ncbi.nlm.nih.gov/geo/samples/GSM2809nnn/GSM2809543/suppl/GSM2809543_Rao-2017-HIC012_30.hic.gz) | HCT-116-RAD21-mAC | Auxin; Biological Sample 2 |
| [*Rao-2017-HIC013*](ftp://ftp.ncbi.nlm.nih.gov/geo/samples/GSM2809nnn/GSM2809544/suppl/GSM2809544_Rao-2017-HIC013_30.hic.gz) | HCT-116-RAD21-mAC | Auxin; Biological Sample 2 |
| [*Rao-2017-HIC014*](ftp://ftp.ncbi.nlm.nih.gov/geo/samples/GSM2809nnn/GSM2809545/suppl/GSM2809545_Rao-2017-HIC014_30.hic.gz) | HCT-116-RAD21-mAC | Auxin; Biological Sample 2 |
| [*Rickman 2012*](https://www.ncbi.nlm.nih.gov/geo/query/acc.cgi?acc=GSM927075) | RWPE1 | ERG library 1 |
| [*Rickman 2012*](https://www.ncbi.nlm.nih.gov/geo/query/acc.cgi?acc=GSM927077) | RWPE1 | ERG library 2 |
| [*Rickman 2012*](https://www.ncbi.nlm.nih.gov/geo/query/acc.cgi?acc=GSM927076) | RWPE1 | GFP library 1 |
| [*Rickman 2012*](https://www.ncbi.nlm.nih.gov/geo/query/acc.cgi?acc=GSM927081) | RWPE1 | GFP library 2 |
| [Zuin 2013](https://www.ncbi.nlm.nih.gov/geo/query/acc.cgi?acc=GSM1081530) | HEK293 | siRNA Control 1 |
| [Zuin 2013](https://www.ncbi.nlm.nih.gov/geo/query/acc.cgi?acc=GSM1081531) | HEK293 | siRNA Control 2 |
| [Zuin 2013](https://www.ncbi.nlm.nih.gov/geo/query/acc.cgi?acc=GSM1081532) | HEK293 | siRNA CTCF 1 |
| [Zuin 2013](https://www.ncbi.nlm.nih.gov/geo/query/acc.cgi?acc=GSM1081533) | HEK293 | siRNA CTCF 2 |

**Supplemental Table S2.** Comparison of multiHiCcompare and FIND over various fold changes and numbers of replicates per group using standard performance classifiers. Performance classifier methods used are “TP” - true positives, “FP” - false positives, “TN” - true negatives, “FN” - false negatives, “TPR” - True Positive Rate, aka recall, or sensitivity , “SPC” - specificity, , “F1” - score, , “Accuracy” - , “Precision” - , “FPR” - False Positive Rate, , “FNR” - False Negative Rate, , “FOR” - False omission rate, , “NPV” - Negative Predictive Value, , “MCC” - Matthews correlation coefficient, , “F1” -

| **Fold Change** | **Comparison** | **Method** | **Total** | **TPR** | **SPC** | **FDR** | **Accuracy** | **Precision** | **FPR** | **FNR** | **FOR** | **NPV** | **MCC** | **F1** |
| --- | --- | --- | --- | --- | --- | --- | --- | --- | --- | --- | --- | --- | --- | --- |
| **2** | **2x2** | **multiHiCcompare** | 90000 | 1 | 1 | 0 | 0.995 | 1 | 0 | 0.89 | 0.005 | 0.995 | 0.33 | 0.197 |
| **FIND** | 90000 | 0.508 | 0.998 | 0.492 | 0.994 | 0.508 | 0.002 | 0.639 | 0.004 | 0.996 | 0.425 | 0.422 |
| **3x3** | **multiHiCcompare** | 90000 | 0.982 | 1 | 0.018 | 0.997 | 0.982 | 0 | 0.552 | 0.003 | 0.997 | 0.662 | 0.615 |
| **FIND** | 90000 | 0.496 | 0.998 | 0.504 | 0.994 | 0.496 | 0.002 | 0.646 | 0.004 | 0.996 | 0.416 | 0.413 |
| **4x4** | **multiHiCcompare** | 90000 | 0.957 | 1 | 0.043 | 0.997 | 0.957 | 0 | 0.509 | 0.003 | 0.997 | 0.684 | 0.649 |
| **FIND** | 90000 | 0.742 | 0.999 | 0.258 | 0.996 | 0.742 | 0.001 | 0.455 | 0.003 | 0.997 | 0.634 | 0.629 |
| **4** | **2x2** | **multiHiCcompare** | 90000 | 0.977 | 1 | 0.023 | 0.997 | 0.977 | 0 | 0.486 | 0.003 | 0.997 | 0.708 | 0.674 |
| **FIND** | 90000 | 0.704 | 0.999 | 0.296 | 0.996 | 0.704 | 0.001 | 0.486 | 0.003 | 0.997 | 0.6 | 0.594 |
| **3x3** | **multiHiCcompare** | 90000 | 0.976 | 1 | 0.024 | 0.998 | 0.976 | 0 | 0.352 | 0.002 | 0.998 | 0.795 | 0.779 |
| **FIND** | 90000 | 0.786 | 0.999 | 0.214 | 0.997 | 0.786 | 0.001 | 0.436 | 0.002 | 0.998 | 0.664 | 0.656 |
| **4x4** | **multiHiCcompare** | 90000 | 0.948 | 1 | 0.052 | 0.997 | 0.948 | 0 | 0.492 | 0.003 | 0.997 | 0.693 | 0.661 |
| **FIND** | 90000 | 0.646 | 0.999 | 0.354 | 0.996 | 0.646 | 0.001 | 0.53 | 0.003 | 0.997 | 0.549 | 0.544 |
| **6** | **2x2** | **multiHiCcompare** | 90000 | 0.961 | 1 | 0.039 | 0.999 | 0.961 | 0 | 0.168 | 0.001 | 0.999 | 0.894 | 0.892 |
| **FIND** | 90000 | 0.747 | 0.999 | 0.253 | 0.996 | 0.747 | 0.001 | 0.464 | 0.003 | 0.997 | 0.631 | 0.624 |
| **3x3** | **multiHiCcompare** | 90000 | 0.963 | 1 | 0.037 | 0.997 | 0.963 | 0 | 0.47 | 0.003 | 0.997 | 0.713 | 0.683 |
| **FIND** | 90000 | 0.501 | 0.998 | 0.499 | 0.995 | 0.501 | 0.002 | 0.633 | 0.003 | 0.997 | 0.426 | 0.424 |
| **4x4** | **multiHiCcompare** | 90000 | 0.96 | 1 | 0.04 | 0.996 | 0.96 | 0 | 0.658 | 0.004 | 0.996 | 0.572 | 0.504 |
| **FIND** | 90000 | 0.744 | 0.999 | 0.256 | 0.996 | 0.744 | 0.001 | 0.463 | 0.003 | 0.997 | 0.63 | 0.624 |

**Supplemental Table S3.** Analysis of transcription factor enrichment in regions detected by multiHiCcompare, HCT-116 colon cancer cell line (Suhas S. P. Rao et al. 2017). Data source - CistromeDB. “Accession number” - GEO accession number; “Transcription Factor” - the protein for which ChIP-seq was performed, “Filename” - the filename for the ChIP-seq peaks, “Mean logFC” - the average log2 fold change for the difference between auxin and normal as determined by multiHiCcompare; “p-value” - the permutation p-value for the test of enrichment in the regions detected by multiHiCcompare.

| **Accession number** | **Transcription Factor** | **Filename** | **Mean logFC** | **p-value** |
| --- | --- | --- | --- | --- |
| GSM749823 | AFF4 | 1140_sort_peaks.narrowPeak.bed | -0.7823 | 9.990E-04 |
| GSM749819 | AFF4 | 1141_sort_peaks.narrowPeak.bed | -0.4494 | 6.993E-03 |
| GSM1162745 | AFF4 | 39916_sort_peaks.narrowPeak.bed | 0.1975 | 5.994E-03 |
| GSM1727069 | AFF4 | 55639_sort_peaks.narrowPeak.bed | -0.0508 | 4.905E-01 |
| GSM1727070 | AFF4 | 55640_sort_peaks.narrowPeak.bed | -0.3941 | 7.163E-01 |
| GSM1727071 | AFF4 | 55641_sort_peaks.narrowPeak.bed | 0.0855 | 6.823E-01 |
| GSM1727072 | AFF4 | 55642_sort_peaks.narrowPeak.bed | 0.0427 | 9.960E-01 |
| GSM1010757 | ATF3 | 46217_sort_peaks.narrowPeak.bed | -0.7915 | 2.997E-03 |
| GSM1010758 | CBX3 | 46209_sort_peaks.narrowPeak.bed | -0.8888 | 9.990E-04 |
| GSM699727 | CBX3 | 9228_sort_peaks.narrowPeak.bed | -0.7562 | 9.990E-04 |
| GSM699729 | CBX3 | 9230_sort_peaks.narrowPeak.bed | -0.8942 | 9.990E-04 |
| GSM699734 | CBX3 | 9231_sort_peaks.narrowPeak.bed | -0.7269 | 5.834E-01 |
| GSM699735 | CBX3 | 9232_sort_peaks.narrowPeak.bed | -0.9280 | 1.099E-02 |
| GSM898224 | CBX3 | 9236_sort_peaks.narrowPeak.bed | 0.0234 | 9.640E-01 |
| GSM898225 | CBX3 | 9237_sort_peaks.narrowPeak.bed | -0.0164 | 6.773E-01 |
| GSM1727073 | CDK9 | 55643_sort_peaks.narrowPeak.bed | -0.3280 | 5.554E-01 |
| GSM1727074 | CDK9 | 55644_sort_peaks.narrowPeak.bed | -0.2649 | 8.402E-01 |
| GSM1866698 | CDK9 | 57093_sort_peaks.narrowPeak.bed | -0.7208 | 7.123E-01 |
| GSM1010852 | CEBPB | 46206_sort_peaks.narrowPeak.bed | -0.8745 | 9.990E-04 |
| GSM1224649 | CTCF | 42148_sort_peaks.narrowPeak.bed | -0.8593 | 4.116E-01 |
| GSM1224650 | CTCF | 42149_sort_peaks.narrowPeak.bed | -0.8703 | 2.018E-01 |
| GSM1224651 | CTCF | 42150_sort_peaks.narrowPeak.bed | -0.8802 | 6.503E-01 |
| GSM1224652 | CTCF | 42151_sort_peaks.narrowPeak.bed | -0.8435 | 7.922E-01 |
| GSM1224653 | CTCF | 42152_sort_peaks.narrowPeak.bed | -0.8649 | 5.624E-01 |
| GSM1224654 | CTCF | 42153_sort_peaks.narrowPeak.bed | -0.8223 | 8.701E-01 |
| GSM1224655 | CTCF | 42154_sort_peaks.narrowPeak.bed | -0.8085 | 8.771E-01 |
| GSM1022652 | CTCF | 45716_sort_peaks.narrowPeak.bed | -0.8704 | 1.768E-01 |
| GSM1022651 | CTCF | 45717_sort_peaks.narrowPeak.bed | -0.8600 | 4.246E-01 |
| GSM1010903 | CTCF | 46218_sort_peaks.narrowPeak.bed | -0.8534 | 9.491E-02 |
| GSM1010846 | EGR1 | 46214_sort_peaks.narrowPeak.bed | -0.7530 | 2.098E-02 |
| GSM1010765 | ELF1 | 46202_sort_peaks.narrowPeak.bed | -0.7571 | 1.099E-02 |
| GSM1162746 | ELL | 39915_sort_peaks.narrowPeak.bed | -0.1672 | 8.062E-01 |
| GSM749822 | ELL2 | 1143_sort_peaks.narrowPeak.bed | -0.7715 | 2.338E-01 |
| GSM749818 | ELL2 | 1144_sort_peaks.narrowPeak.bed | -0.8095 | 1.229E-01 |
| GSM1727075 | ELL2 | 55645_sort_peaks.narrowPeak.bed | -0.4045 | 5.285E-01 |
| GSM1727076 | ELL2 | 55646_sort_peaks.narrowPeak.bed | -0.6241 | 8.991E-01 |
| GSM1727077 | ELL2 | 55647_sort_peaks.narrowPeak.bed | -0.2366 | 3.167E-01 |
| GSM1727078 | ELL2 | 55648_sort_peaks.narrowPeak.bed | -0.6525 | 9.261E-01 |
| GSM1240110 | EP300 | 42907_sort_peaks.narrowPeak.bed | -0.8923 | 9.990E-04 |
| GSM1010756 | FOSL1 | 46212_sort_peaks.narrowPeak.bed | -0.8909 | 9.990E-04 |
| GSM1535696 | HNF4A | 54660_sort_peaks.narrowPeak.bed | -0.7359 | 6.004E-01 |
| GSM1535701 | HNF4A | 54665_sort_peaks.narrowPeak.bed | -0.7547 | 7.383E-01 |
| GSM1535702 | HNF4A | 54666_sort_peaks.narrowPeak.bed | -0.7600 | 3.027E-01 |
| GSM1535709 | HNF4A | 54673_sort_peaks.narrowPeak.bed | -0.9325 | 3.097E-02 |
| GSM1535710 | HNF4A | 54674_sort_peaks.narrowPeak.bed | -0.9759 | 4.296E-02 |
| GSM1382049 | HSF1 | 51107_sort_peaks.narrowPeak.bed | -0.7577 | 9.281E-01 |
| GSM1382050 | HSF1 | 51108_sort_peaks.narrowPeak.bed | -0.7158 | 8.462E-01 |
| GSM1382052 | HSF1 | 51110_sort_peaks.narrowPeak.bed | -0.6184 | 9.740E-01 |
| GSM1382054 | HSF1 | 51112_sort_peaks.narrowPeak.bed | -0.2609 | 9.860E-01 |
| GSM1382055 | HSF1 | 51113_sort_peaks.narrowPeak.bed | 0.2973 | 9.670E-01 |
| GSM1382057 | HSF1 | 51115_sort_peaks.narrowPeak.bed | -0.4209 | 9.381E-01 |
| GSM1010847 | JUND | 46213_sort_peaks.narrowPeak.bed | -0.8686 | 9.990E-04 |
| GSM1240109 | KMT2B | 42906_sort_peaks.narrowPeak.bed | -0.8358 | 9.990E-04 |
| GSM1866696 | LARP7 | 57091_sort_peaks.narrowPeak.bed | -0.6278 | 9.101E-01 |
| GSM1727091 | LEO1 | 55661_sort_peaks.narrowPeak.bed | -0.1623 | 2.368E-01 |
| GSM1010904 | MAX | 46216_sort_peaks.narrowPeak.bed | -0.8191 | 9.990E-04 |
| GSM1154509 | MECP2 | 34399_sort_peaks.narrowPeak.bed | -0.8212 | 1.598E-02 |
| GSM1154510 | MECP2 | 34400_sort_peaks.narrowPeak.bed | -0.8802 | 4.236E-01 |
| GSM1727090 | NR0B2 | 55660_sort_peaks.narrowPeak.bed | 0.1713 | 1.219E-01 |
| GSM1727094 | PAF1 | 55664_sort_peaks.narrowPeak.bed | -0.6079 | 4.895E-01 |
| GSM1727095 | PAF1 | 55665_sort_peaks.narrowPeak.bed | -0.5583 | 6.164E-01 |
| GSM1727096 | PAF1 | 55666_sort_peaks.narrowPeak.bed | -0.4464 | 4.925E-01 |
| GSM1727097 | PAF1 | 55667_sort_peaks.narrowPeak.bed | -0.6220 | 5.594E-02 |
| GSM1727098 | PAF1 | 55668_sort_peaks.narrowPeak.bed | -0.5813 | 6.284E-01 |
| GSM1727099 | PAF1 | 55669_sort_peaks.narrowPeak.bed | -0.5571 | 6.703E-01 |
| GSM1727106 | PAF1 | 55676_sort_peaks.narrowPeak.bed | -0.0116 | 6.484E-01 |
| GSM749821 | POLR2A | 1151_sort_peaks.narrowPeak.bed | -0.6489 | 1.848E-01 |
| GSM749817 | POLR2A | 1152_sort_peaks.narrowPeak.bed | -0.6357 | 4.685E-01 |
| GSM1154513 | POLR2A | 34398_sort_peaks.narrowPeak.bed | -0.7408 | 2.587E-01 |
| GSM1162752 | POLR2A | 39917_sort_peaks.narrowPeak.bed | -0.6931 | 3.696E-02 |
| GSM1162755 | POLR2A | 39921_sort_peaks.narrowPeak.bed | -0.6969 | 2.198E-02 |
| GSM935426 | POLR2A | 45715_sort_peaks.narrowPeak.bed | -0.5847 | 6.304E-01 |
| GSM803474 | POLR2A | 46201_sort_peaks.narrowPeak.bed | -0.7520 | 4.995E-03 |
| GSM1465032 | POLR2A | 49533_sort_peaks.narrowPeak.bed | -0.4726 | 8.591E-01 |
| GSM1465033 | POLR2A | 49534_sort_peaks.narrowPeak.bed | -0.5088 | 9.780E-01 |
| GSM1465034 | POLR2A | 49535_sort_peaks.narrowPeak.bed | -0.5791 | 5.285E-01 |
| GSM1727092 | POLR2A | 55662_sort_peaks.narrowPeak.bed | -0.4742 | 3.606E-01 |
| GSM1727093 | POLR2A | 55663_sort_peaks.narrowPeak.bed | -0.4969 | 8.761E-01 |
| GSM1727100 | POLR2A | 55670_sort_peaks.narrowPeak.bed | -0.2656 | 6.943E-01 |
| GSM1727101 | POLR2A | 55671_sort_peaks.narrowPeak.bed | -0.5959 | 4.705E-01 |
| GSM1727102 | POLR2A | 55672_sort_peaks.narrowPeak.bed | -0.4995 | 7.173E-01 |
| GSM1727103 | POLR2A | 55673_sort_peaks.narrowPeak.bed | -0.4935 | 8.282E-01 |
| GSM1727104 | POLR2A | 55674_sort_peaks.narrowPeak.bed | -0.5530 | 3.327E-01 |
| GSM1727105 | POLR2A | 55675_sort_peaks.narrowPeak.bed | -0.5883 | 7.273E-01 |
| GSM1727107 | POLR2A | 55677_sort_peaks.narrowPeak.bed | -0.1744 | 9.600E-01 |
| GSM1727108 | POLR2A | 55678_sort_peaks.narrowPeak.bed | 0.0674 | 9.540E-01 |
| GSM1727109 | POLR2A | 55679_sort_peaks.narrowPeak.bed | -0.0059 | 9.790E-01 |
| GSM1727110 | POLR2A | 55680_sort_peaks.narrowPeak.bed | 0.4066 | 6.893E-01 |
| GSM833286 | POLR2A | 5661_sort_peaks.narrowPeak.bed | -0.6167 | 5.804E-01 |
| GSM1866693 | POLR2A | 57088_sort_peaks.narrowPeak.bed | -0.4551 | 9.720E-01 |
| GSM1866694 | POLR2A | 57089_sort_peaks.narrowPeak.bed | -0.5729 | 5.205E-01 |
| GSM1010848 | RAD21 | 46207_sort_peaks.narrowPeak.bed | -0.8674 | 9.990E-04 |
| GSM1010869 | REST | 46203_sort_peaks.narrowPeak.bed | -0.6385 | 1.369E-01 |
| GSM1010905 | SIN3A | 46208_sort_peaks.narrowPeak.bed | -0.7064 | 6.294E-02 |
| GSM2809611 | SMC1A | 85289_peaks.bed | -0.8489 | 4.396E-02 |
| GSM1010902 | SP1 | 46215_sort_peaks.narrowPeak.bed | -0.8675 | 9.990E-04 |
| GSM855444 | SP1 | 5390_sort_peaks.narrowPeak.bed | -1.7630 | 8.991E-02 |
| GSM855445 | SP1 | 5391_sort_peaks.narrowPeak.bed | -1.2849 | 9.790E-02 |
| GSM855447 | SP1 | 5393_sort_peaks.narrowPeak.bed | -1.1784 | 4.176E-01 |
| GSM855449 | SP1 | 5395_sort_peaks.narrowPeak.bed | -0.5384 | 9.830E-01 |
| GSM1010851 | SRF | 46211_sort_peaks.narrowPeak.bed | -0.8295 | 9.990E-04 |
| GSM1535697 | TCF4 | 54661_sort_peaks.narrowPeak.bed | -1.0047 | 9.990E-04 |
| GSM1535698 | TCF4 | 54662_sort_peaks.narrowPeak.bed | -1.0736 | 9.391E-02 |
| GSM1535699 | TCF4 | 54663_sort_peaks.narrowPeak.bed | -1.0455 | 1.998E-02 |
| GSM1535700 | TCF4 | 54664_sort_peaks.narrowPeak.bed | -1.0548 | 3.297E-02 |
| GSM1535703 | TCF4 | 54667_sort_peaks.narrowPeak.bed | -1.0732 | 2.997E-03 |
| GSM1535704 | TCF4 | 54668_sort_peaks.narrowPeak.bed | -1.3284 | 2.737E-01 |
| GSM1535705 | TCF4 | 54669_sort_peaks.narrowPeak.bed | -0.9754 | 1.109E-01 |
| GSM1535706 | TCF4 | 54670_sort_peaks.narrowPeak.bed | -1.0073 | 4.795E-02 |
| GSM782123 | TCF7L2 | 45714_sort_peaks.narrowPeak.bed | -0.8291 | 9.990E-04 |
| GSM1010772 | TEAD4 | 46210_sort_peaks.narrowPeak.bed | -0.8177 | 9.990E-04 |
| GSM1152879 | TET2 | 50981_sort_peaks.narrowPeak.bed | -0.4797 | 8.382E-01 |
| GSM1412743 | TP53 | 50344_sort_peaks.narrowPeak.bed | -1.2044 | 6.943E-01 |
| GSM1412744 | TP53 | 50345_sort_peaks.narrowPeak.bed | -1.0012 | 8.392E-02 |
| GSM1417250 | TP53 | 50346_sort_peaks.narrowPeak.bed | -1.1125 | 5.315E-01 |
| GSM1468849 | TP53 | 53285_sort_peaks.narrowPeak.bed | -1.0594 | 7.043E-01 |
| GSM1468850 | TP53 | 53286_sort_peaks.narrowPeak.bed | -0.9280 | 5.704E-01 |
| GSM1866695 | TRIM28 | 57090_sort_peaks.narrowPeak.bed | -0.6549 | 9.970E-01 |
| GSM1010836 | USF1 | 46205_sort_peaks.narrowPeak.bed | -0.7887 | 1.998E-03 |
| GSM1165982 | USP49 | 39345_sort_peaks.narrowPeak.bed | 0.0264 | 9.111E-01 |
| GSM1165983 | USP49 | 39347_sort_peaks.narrowPeak.bed | -0.2937 | 9.890E-01 |
| GSM803354 | YY1 | 46204_sort_peaks.narrowPeak.bed | -0.7807 | 1.099E-02 |
| GSM803458 | ZBTB33 | 46200_sort_peaks.narrowPeak.bed | -0.5795 | 3.996E-03 |
| GSM1162749 | ZC3H8 | 39918_sort_peaks.narrowPeak.bed | -0.7304 | 6.993E-03 |

**Supplemental Table S4.** Analysis of multiHiCcompare performance over various resolutions and at various fold changes for added in differences. Data from HCT-116 cell lines at resolutions of 50KB, 10KB, and 5KB from chromosome 18. Performance classifier methods used are “TP” - true positives, “FP” - false positives, “TN” - true negatives, “FN” - false negatives, “TPR” - True Positive Rate, aka recall, or sensitivity , “SPC” - specificity, , “F1” - score, , “Accuracy” - , “Precision” - , “FPR” - False Positive Rate, , “FNR” - False Negative Rate, , “FOR” - False omission rate, , “NPV” - Negative Predictive Value, , “MCC” - Matthews correlation coefficient, , “F1” -

| **Measure** | **TP** | **FP** | **TN** | **FN** | **F1** | **AUC** | **FDR** | **Accuracy** | **Precision** | **FPR** | **FNR** | **FOR** | **NPV** | **MCC** |
| --- | --- | --- | --- | --- | --- | --- | --- | --- | --- | --- | --- | --- | --- | --- |
| **50KB; FC=2** | 2011 | 57 | 77117 | 2989 | 0.569 | 0.865 | 0.963 | 0.963 | 0.972 | 0.001 | 0.598 | 0.037 | 0.963 | 0.613 |
| **50KB; FC=4** | 4404 | 103 | 77071 | 596 | 0.926 | 0.989 | 0.991 | 0.991 | 0.977 | 0.001 | 0.119 | 0.008 | 0.992 | 0.923 |
| **50KB; FC=6** | 4782 | 121 | 77053 | 218 | 0.966 | 0.997 | 0.996 | 0.996 | 0.975 | 0.002 | 0.044 | 0.003 | 0.997 | 0.964 |
| **10KB; FC=2** | 1267 | 41 | 65802 | 3733 | 0.402 | 0.81 | 0.947 | 0.947 | 0.969 | 0.001 | 0.747 | 0.054 | 0.946 | 0.481 |
| **10KB; FC=4** | 3942 | 115 | 65728 | 1058 | 0.87 | 0.982 | 0.983 | 0.983 | 0.972 | 0.002 | 0.212 | 0.016 | 0.984 | 0.867 |
| **10KB; FC=6** | 4653 | 142 | 65701 | 347 | 0.95 | 0.996 | 0.993 | 0.993 | 0.97 | 0.002 | 0.069 | 0.005 | 0.995 | 0.947 |
| **5KB; FC=2** | 2659 | 40 | 30362 | 2341 | 0.691 | 0.911 | 0.933 | 0.933 | 0.985 | 0.001 | 0.468 | 0.072 | 0.928 | 0.696 |
| **5KB; FC=4** | 4573 | 93 | 30309 | 427 | 0.946 | 0.992 | 0.985 | 0.985 | 0.98 | 0.003 | 0.085 | 0.014 | 0.986 | 0.938 |
| **5KB; FC=6** | 4862 | 111 | 30291 | 138 | 0.975 | 0.997 | 0.993 | 0.993 | 0.978 | 0.004 | 0.028 | 0.005 | 0.995 | 0.971 |

**Supplemental Table S5**. Analysis of transcription factor enrichment in regions detected by multiHiCcompare, HEK293 cell line (Zuin et al. 2013). Data source - CistromeDB. “Accession number” - GEO accession number; “Transcription Factor” - the protein for which ChIP-seq was performed, “Filename” - the filename for the ChIP-seq peaks, “Mean logFC” - the average log2 fold change for the difference between auxin and normal as determined by multiHiCcompare; “p-value” - the permutation p-value for the test of enrichment in the regions detected by multiHiCcompare.

| Accession number | Transcription Factor | Filename | Mean logFC | p-value |
| --- | --- | --- | --- | --- |
| GSM520382 | PHF8 | 93_sort_peaks.narrowPeak.bed | 2.3149 | 9.99E-04 |
| GSM509047 | POLR3G | 1168_sort_peaks.narrowPeak.bed | -4.0542 | 4.64E-01 |
| GSM700361 | ELK4 | 1172_sort_peaks.narrowPeak.bed | 1.3192 | 2.00E-03 |
| GSM700360 | ELK4 | 1173_sort_peaks.narrowPeak.bed | 0.7415 | 9.99E-04 |
| GSM700357 | TRIM28 | 1174_sort_peaks.narrowPeak.bed | 2.9604 | 9.99E-04 |
| GSM700356 | TRIM28 | 1175_sort_peaks.narrowPeak.bed | 3.2611 | 9.99E-04 |
| GSM700355 | TRIM28 | 1176_sort_peaks.narrowPeak.bed | 0.9149 | 9.99E-04 |
| GSM700354 | TRIM28 | 1177_sort_peaks.narrowPeak.bed | 5.3508 | 3.00E-03 |
| GSM700353 | TRIM28 | 1178_sort_peaks.narrowPeak.bed | 3.2052 | 9.99E-04 |
| GSM301567 | POLR2A | 1191_sort_peaks.narrowPeak.bed | 2.3045 | 9.99E-04 |
| GSM301566 | POLR2A | 1192_sort_peaks.narrowPeak.bed | 2.7456 | 9.99E-04 |
| GSM700359 | TRIM28 | 1194_sort_peaks.narrowPeak.bed | 3.0933 | 9.99E-04 |
| GSM700358 | TRIM28 | 1195_sort_peaks.narrowPeak.bed | 3.2831 | 9.99E-04 |
| GSM301581 | POLR2A | 2642_sort_peaks.narrowPeak.bed | 3.2945 | 9.99E-04 |
| GSM301568 | POLR2A | 2643_sort_peaks.narrowPeak.bed | 3.1398 | 9.99E-04 |
| GSM855007 | RNF2 | 8549_sort_peaks.narrowPeak.bed | 2.0241 | 9.99E-04 |
| GSM855008 | RYBP | 8550_sort_peaks.narrowPeak.bed | 1.9526 | 9.99E-04 |
| GSM855010 | PCGF2 | 8552_sort_peaks.narrowPeak.bed | -0.4727 | 7.79E-02 |
| GSM855011 | BMI1 | 8553_sort_peaks.narrowPeak.bed | 2.1225 | 3.00E-03 |
| GSM855013 | PCGF6 | 8555_sort_peaks.narrowPeak.bed | 5.5337 | 3.10E-02 |
| GSM855014 | CBX2 | 8556_sort_peaks.narrowPeak.bed | 8.9304 | 1.50E-01 |
| GSM855017 | RNF2 | 8559_sort_peaks.narrowPeak.bed | -2.7727 | 1.11E-01 |
| GSM855018 | RYBP | 8560_sort_peaks.narrowPeak.bed | -0.875 | 6.29E-02 |
| GSM855019 | BMI1 | 8561_sort_peaks.narrowPeak.bed | 4.3306 | 1.85E-01 |
| GSM855020 | CBX2 | 8562_sort_peaks.narrowPeak.bed | 3.4874 | 5.67E-01 |
| GSM865742 | GPS2 | 8563_sort_peaks.narrowPeak.bed | 1.9827 | 8.29E-01 |
| GSM865743 | TBL1X | 8564_sort_peaks.narrowPeak.bed | 2.2675 | 9.99E-04 |
| GSM865744 | NCOR1 | 8565_sort_peaks.narrowPeak.bed | 3.6005 | 9.99E-04 |
| GSM865745 | NCOR1 | 8566_sort_peaks.narrowPeak.bed | 2.8181 | 9.99E-04 |
| GSM897577 | TET3 | 33988_sort_peaks.narrowPeak.bed | 2.2432 | 9.99E-04 |
| GSM897576 | TET2 | 33992_sort_peaks.narrowPeak.bed | 3.0843 | 9.99E-04 |
| GSM1054011 | MYC | 34317_sort_peaks.narrowPeak.bed | 2.7853 | 7.49E-02 |
| GSM1054009 | MYC | 34318_sort_peaks.narrowPeak.bed | 2.4976 | 9.99E-04 |
| GSM1054010 | MYC | 34319_sort_peaks.narrowPeak.bed | 3.3474 | 1.20E-01 |
| GSM1050111 | GCG | 34532_sort_peaks.narrowPeak.bed | 2.904 | 6.79E-02 |
| GSM1050110 | EHMT2 | 34535_sort_peaks.narrowPeak.bed | 3.6662 | 5.09E-02 |
| GSM971947 | BRD3 | 35874_sort_peaks.narrowPeak.bed | 1.4877 | 9.99E-04 |
| GSM971949 | CBX5 | 35875_sort_peaks.narrowPeak.bed | 6.6305 | 6.39E-02 |
| GSM971948 | BRD4 | 35876_sort_peaks.narrowPeak.bed | -0.9776 | 1.10E-02 |
| GSM971946 | BRD2 | 35878_sort_peaks.narrowPeak.bed | 2.7475 | 9.99E-04 |
| GSM971950 | CBX1 | 35879_sort_peaks.narrowPeak.bed | 4.3306 | 2.37E-01 |
| GSM1140398 | FANCD2 | 36113_sort_peaks.narrowPeak.bed | 4.1734 | 8.19E-02 |
| GSM1140397 | FANCD2 | 36114_sort_peaks.narrowPeak.bed | 2.6222 | 9.99E-04 |
| GSM891243 | DCP1A | 36226_sort_peaks.narrowPeak.bed | 2.7263 | 9.99E-04 |
| GSM891244 | POLR2A | 36227_sort_peaks.narrowPeak.bed | 3.7736 | 9.99E-04 |
| GSM891241 | XRN2 | 36228_sort_peaks.narrowPeak.bed | 2.3776 | 9.99E-04 |
| GSM891239 | TTF2 | 36230_sort_peaks.narrowPeak.bed | 2.6618 | 9.99E-04 |
| GSM891240 | XRN2 | 36234_sort_peaks.narrowPeak.bed | 2.372 | 9.99E-04 |
| GSM891242 | POLR2A | 36235_sort_peaks.narrowPeak.bed | 2.2812 | 9.99E-04 |
| GSM1151769 | YBX1 | 36659_sort_peaks.narrowPeak.bed | 2.0411 | 8.99E-02 |
| GSM959048 | ZNF143 | 36766_sort_peaks.narrowPeak.bed | 3.3148 | 9.99E-04 |
| GSM841736 | AFF4 | 38227_sort_peaks.narrowPeak.bed | 0.9309 | 3.50E-02 |
| GSM1018960 | TET3 | 39719_sort_peaks.narrowPeak.bed | 2.9154 | 9.99E-04 |
| GSM1037511 | HCFC1 | 39886_sort_peaks.narrowPeak.bed | 2.5906 | 9.99E-04 |
| GSM844016 | POLR2A | 39930_sort_peaks.narrowPeak.bed | 2.7942 | 9.99E-04 |
| GSM1081542 | SMC3 | 41382_sort_peaks.narrowPeak.bed | 2.7747 | 9.99E-04 |
| GSM1176699 | NR3C1 | 41735_sort_peaks.narrowPeak.bed | 2.8303 | 9.99E-04 |
| GSM1176700 | NR3C1 | 41736_sort_peaks.narrowPeak.bed | 10.8515 | 1.16E-01 |
| GSM1176701 | NR3C1 | 41737_sort_peaks.narrowPeak.bed | 2.7793 | 3.50E-02 |
| GSM1176702 | NR3C1 | 41738_sort_peaks.narrowPeak.bed | 2.366 | 9.99E-01 |
| GSM1215133 | EZH2 | 41974_sort_peaks.narrowPeak.bed | 1.5614 | 4.67E-01 |
| GSM1220022 | BRD4 | 42100_sort_peaks.narrowPeak.bed | 5.455 | 4.00E-02 |
| GSM1220024 | BRD4 | 42102_sort_peaks.narrowPeak.bed | 6.8626 | 5.79E-02 |
| GSM1239069 | EP300 | 42633_sort_peaks.narrowPeak.bed | 2.5434 | 9.99E-04 |
| GSM1239070 | EP300 | 42634_sort_peaks.narrowPeak.bed | 2.7823 | 9.99E-04 |
| GSM1239073 | CREBBP | 42637_sort_peaks.narrowPeak.bed | 2.6844 | 9.99E-04 |
| GSM1239074 | CREBBP | 42638_sort_peaks.narrowPeak.bed | 2.8931 | 9.99E-04 |
| GSM1249879 | JMJD6 | 43063_sort_peaks.narrowPeak.bed | 2.389 | 9.99E-04 |
| GSM1249880 | JMJD6 | 43064_sort_peaks.narrowPeak.bed | 2.5348 | 9.99E-04 |
| GSM1249881 | BRD4 | 43065_sort_peaks.narrowPeak.bed | 2.0311 | 9.99E-04 |
| GSM1249882 | BRD4 | 43066_sort_peaks.narrowPeak.bed | 2.6503 | 9.99E-04 |
| GSM1249890 | EP300 | 43074_sort_peaks.narrowPeak.bed | 3.4132 | 9.99E-04 |
| GSM1249891 | POLR2A | 43075_sort_peaks.narrowPeak.bed | 2.7784 | 9.99E-04 |
| GSM1249892 | POLR2A | 43076_sort_peaks.narrowPeak.bed | 0.655 | 6.99E-03 |
| GSM1249893 | POLR2A | 43077_sort_peaks.narrowPeak.bed | 2.4636 | 9.99E-04 |
| GSM1249894 | POLR2A | 43078_sort_peaks.narrowPeak.bed | 2.5297 | 9.99E-04 |
| GSM1249895 | POLR2A | 43079_sort_peaks.narrowPeak.bed | 2.6567 | 9.99E-04 |
| GSM1249896 | POLR2A | 43080_sort_peaks.narrowPeak.bed | 2.5128 | 9.99E-04 |
| GSM1249897 | CDK9 | 43081_sort_peaks.narrowPeak.bed | 2.4019 | 9.99E-04 |
| GSM1249898 | CDK9 | 43082_sort_peaks.narrowPeak.bed | 1.6415 | 9.99E-04 |
| GSM1249899 | CDK9 | 43083_sort_peaks.narrowPeak.bed | 2.8068 | 9.99E-04 |
| GSM1294929 | EZH2 | 43542_sort_peaks.narrowPeak.bed | 4.0547 | 1.75E-01 |
| GSM1294931 | EZH2 | 43544_sort_peaks.narrowPeak.bed | 5.0136 | 3.90E-01 |
| GSM1294933 | C10orf12 | 43546_sort_peaks.narrowPeak.bed | 4.3306 | 7.19E-02 |
| GSM1294935 | C10orf12 | 43548_sort_peaks.narrowPeak.bed | 4.3306 | 9.49E-02 |
| GSM1294937 | C17orf96 | 43550_sort_peaks.narrowPeak.bed | 4.7975 | 2.00E-03 |
| GSM1294939 | C17orf96 | 43552_sort_peaks.narrowPeak.bed | 3.8213 | 9.99E-03 |
| GSM1294942 | CBX4 | 43555_sort_peaks.narrowPeak.bed | 1.1606 | 9.99E-04 |
| GSM1301133 | DPPA2 | 43668_sort_peaks.narrowPeak.bed | 3.1886 | 9.99E-04 |
| GSM1301134 | TET3 | 43669_sort_peaks.narrowPeak.bed | 2.9494 | 9.99E-04 |
| GSM749668 | CTCF | 45720_sort_peaks.narrowPeak.bed | 2.8618 | 9.99E-04 |
| GSM749687 | CTCF | 45721_sort_peaks.narrowPeak.bed | 2.6487 | 9.99E-04 |
| GSM935534 | POLR2A | 45722_sort_peaks.narrowPeak.bed | 2.5549 | 9.99E-04 |
| GSM782124 | TCF7L2 | 45723_sort_peaks.narrowPeak.bed | 2.0938 | 9.68E-01 |
| GSM935590 | ELK4 | 45724_sort_peaks.narrowPeak.bed | 1.2037 | 9.99E-04 |
| GSM935592 | TRIM28 | 45725_sort_peaks.narrowPeak.bed | 3.0235 | 9.99E-04 |
| GSM935577 | ZNF263 | 45726_sort_peaks.narrowPeak.bed | 2.9817 | 9.99E-04 |
| GSM1192069 | POLR2A | 47398_sort_peaks.narrowPeak.bed | 1.1574 | 9.99E-04 |
| GSM1192071 | POLR2A | 47400_sort_peaks.narrowPeak.bed | 2.474 | 9.99E-04 |
| GSM1192073 | POLR2A | 47402_sort_peaks.narrowPeak.bed | 2.5683 | 9.99E-04 |
| GSM1192076 | POLR2A | 47405_sort_peaks.narrowPeak.bed | 2.8973 | 9.99E-04 |
| GSM1192077 | POLR2A | 47406_sort_peaks.narrowPeak.bed | 2.7728 | 9.99E-04 |
| GSM1308228 | AR | 48084_sort_peaks.narrowPeak.bed | 4.3306 | 1.46E-01 |
| GSM1308229 | AR | 48085_sort_peaks.narrowPeak.bed | 2.9077 | 3.96E-01 |
| GSM1308230 | AR | 48086_sort_peaks.narrowPeak.bed | 2.8914 | 5.86E-01 |
| GSM1308231 | AR | 48087_sort_peaks.narrowPeak.bed | 7.6177 | 2.00E-01 |
| GSM1308232 | AR | 48088_sort_peaks.narrowPeak.bed | 2.9353 | 9.56E-01 |
| GSM1308233 | AR | 48089_sort_peaks.narrowPeak.bed | 2.7766 | 8.28E-01 |
| GSM1414504 | EMX1 | 49178_sort_peaks.narrowPeak.bed | 2.7719 | 5.00E-03 |
| GSM1414505 | EMX1 | 49179_sort_peaks.narrowPeak.bed | 4.2928 | 2.90E-02 |
| GSM1416527 | F2RL1 | 49198_sort_peaks.narrowPeak.bed | 8.9304 | 1.47E-01 |
| GSM1369392 | DDX21 | 50210_sort_peaks.narrowPeak.bed | 2.7353 | 9.99E-04 |
| GSM1531550 | POLR2A | 51772_sort_peaks.narrowPeak.bed | 2.5911 | 9.99E-04 |
| GSM1493018 | MYC | 52424_sort_peaks.narrowPeak.bed | 3.7759 | 9.99E-04 |
| GSM1493019 | MYC | 52425_sort_peaks.narrowPeak.bed | 5.1215 | 3.30E-02 |
| GSM1493021 | MYC | 52427_sort_peaks.narrowPeak.bed | 2.2677 | 9.99E-04 |
| GSM1493022 | MYC | 52428_sort_peaks.narrowPeak.bed | 2.4513 | 2.00E-03 |
| GSM1493023 | MYC | 52429_sort_peaks.narrowPeak.bed | 2.6239 | 9.99E-04 |
| GSM1493024 | MYC | 52430_sort_peaks.narrowPeak.bed | 8.1957 | 8.39E-02 |
| GSM1493026 | WDR5 | 52432_sort_peaks.narrowPeak.bed | 2.7987 | 9.99E-04 |
| GSM1493028 | WDR5 | 52434_sort_peaks.narrowPeak.bed | 5.2654 | 2.00E-03 |
| GSM1493030 | WDR5 | 52436_sort_peaks.narrowPeak.bed | 2.7443 | 9.99E-04 |
| GSM1530051 | EHMT2 | 52585_sort_peaks.narrowPeak.bed | 4.3306 | 6.39E-02 |
| GSM1530052 | ZNF644 | 52586_sort_peaks.narrowPeak.bed | 4.3306 | 9.49E-02 |
| GSM1464011 | FOXM1 | 53251_sort_peaks.narrowPeak.bed | 2.3267 | 9.99E-04 |
| GSM1464012 | FOXM1 | 53252_sort_peaks.narrowPeak.bed | 2.3477 | 3.00E-03 |
| GSM1464013 | FOXM1 | 53253_sort_peaks.narrowPeak.bed | 3.3634 | 9.99E-04 |
| GSM1464014 | FOXM1 | 53254_sort_peaks.narrowPeak.bed | 2.9099 | 9.99E-04 |
| GSM1464016 | FOXM1 | 53256_sort_peaks.narrowPeak.bed | 2.5358 | 9.99E-04 |
| GSM1464017 | FOXM1 | 53257_sort_peaks.narrowPeak.bed | 1.9616 | 9.99E-04 |
| GSM1464019 | FOXM1 | 53259_sort_peaks.narrowPeak.bed | 3.1531 | 9.99E-04 |
| GSM1464020 | FOXM1 | 53260_sort_peaks.narrowPeak.bed | 2.9568 | 9.99E-04 |
| GSM1464021 | FOXM1 | 53261_sort_peaks.narrowPeak.bed | 1.7187 | 9.99E-04 |
| GSM1464022 | FOXM1 | 53262_sort_peaks.narrowPeak.bed | 2.1324 | 9.99E-04 |
| GSM1464023 | FOXM1 | 53263_sort_peaks.narrowPeak.bed | 3.5308 | 9.99E-04 |
| GSM1464024 | FOXM1 | 53264_sort_peaks.narrowPeak.bed | 2.7893 | 9.99E-04 |
| GSM1820477 | POLR2A | 55798_sort_peaks.narrowPeak.bed | 2.604 | 9.99E-04 |
| GSM1820478 | POLR2A | 55799_sort_peaks.narrowPeak.bed | 2.7346 | 9.99E-04 |
| GSM1820479 | POLR2A | 55800_sort_peaks.narrowPeak.bed | 2.5206 | 9.99E-04 |
| GSM1820483 | POLR2A | 55804_sort_peaks.narrowPeak.bed | 2.6223 | 9.99E-04 |
| GSM1820484 | POLR2A | 55805_sort_peaks.narrowPeak.bed | 2.548 | 9.99E-04 |
| GSM1820485 | POLR2A | 55806_sort_peaks.narrowPeak.bed | 2.4712 | 9.99E-04 |
| GSM1533742 | BRD1 | 56279_sort_peaks.narrowPeak.bed | 0.7263 | 5.00E-03 |
| GSM1533743 | BRD1 | 56280_sort_peaks.narrowPeak.bed | -0.0688 | 2.20E-02 |
| GSM1533744 | BRD1 | 56281_sort_peaks.narrowPeak.bed | 8.1963 | 1.80E-02 |
| GSM1533745 | BRD1 | 56282_sort_peaks.narrowPeak.bed | 4.0429 | 3.50E-02 |
| GSM1644649 | EHMT2 | 56446_sort_peaks.narrowPeak.bed | 2.4287 | 1.00E+00 |
| GSM1644650 | EHMT2 | 56447_sort_peaks.narrowPeak.bed | 2.9767 | 1.00E+00 |
| GSM1644651 | EHMT2 | 56448_sort_peaks.narrowPeak.bed | 2.898 | 1.00E+00 |
| GSM1644652 | EHMT2 | 56449_sort_peaks.narrowPeak.bed | 3.5749 | 1.00E+00 |
| GSM1644657 | EHMT2 | 56454_sort_peaks.narrowPeak.bed | 2.9445 | 1.00E+00 |
| GSM1644658 | EHMT2 | 56455_sort_peaks.narrowPeak.bed | 1.7354 | 9.99E-01 |
| GSM1644659 | EHMT2 | 56456_sort_peaks.narrowPeak.bed | 4.2466 | 7.01E-01 |
| GSM1644660 | EHMT2 | 56457_sort_peaks.narrowPeak.bed | 2.4116 | 1.00E+00 |
| GSM1644665 | EHMT2 | 56462_sort_peaks.narrowPeak.bed | 3.8064 | 1.00E+00 |
| GSM1644666 | EHMT2 | 56463_sort_peaks.narrowPeak.bed | 2.5533 | 1.00E+00 |
| GSM1644669 | EHMT2 | 56466_sort_peaks.narrowPeak.bed | 3.8258 | 9.98E-01 |
| GSM1644670 | EHMT2 | 56467_sort_peaks.narrowPeak.bed | 3.0498 | 7.29E-02 |
| GSM1910998 | CTCF | 57284_sort_peaks.narrowPeak.bed | 2.6013 | 9.99E-04 |
| GSM1290241 | BAHD1 | 57659_sort_peaks.narrowPeak.bed | 2.665 | 1.00E+00 |
| GSM1290243 | BAHD1 | 57661_sort_peaks.narrowPeak.bed | 3.2009 | 9.99E-04 |
| GSM1290244 | BAHD1 | 57662_sort_peaks.narrowPeak.bed | 3.6607 | 9.99E-04 |
| GSM1872288 | POLR2A | 58834_sort_peaks.narrowPeak.bed | 2.2956 | 9.99E-04 |
| GSM1872289 | POLR2A | 58835_sort_peaks.narrowPeak.bed | 2.0191 | 9.99E-04 |
| GSM1872290 | POLR2A | 58836_sort_peaks.narrowPeak.bed | 2.9058 | 9.99E-04 |
| GSM1872291 | POLR2A | 58837_sort_peaks.narrowPeak.bed | 3.0267 | 9.99E-04 |
| GSM1872292 | POLR2A | 58838_sort_peaks.narrowPeak.bed | 2.2135 | 9.99E-04 |
| GSM1872293 | POLR2A | 58839_sort_peaks.narrowPeak.bed | 2.3824 | 9.99E-04 |
| GSM1872294 | XRN2 | 58840_sort_peaks.narrowPeak.bed | 2.7224 | 9.99E-04 |
| GSM1872295 | XRN2 | 58841_sort_peaks.narrowPeak.bed | 2.6983 | 9.99E-04 |
| GSM1872296 | XRN2 | 58842_sort_peaks.narrowPeak.bed | 2.7581 | 9.99E-04 |
| GSM1872297 | XRN2 | 58843_sort_peaks.narrowPeak.bed | 2.3025 | 9.99E-04 |
| GSM1872298 | XRN2 | 58844_sort_peaks.narrowPeak.bed | 2.6234 | 9.99E-04 |
| GSM1872299 | XRN2 | 58845_sort_peaks.narrowPeak.bed | 3.056 | 9.99E-04 |
| GSM1872300 | XRN2 | 58846_sort_peaks.narrowPeak.bed | 3.3542 | 2.00E-03 |
| GSM1892295 | SMN1 | 58948_sort_peaks.narrowPeak.bed | 1.4541 | 5.99E-02 |
| GSM1892296 | SMN1 | 58949_sort_peaks.narrowPeak.bed | 2.2222 | 7.70E-01 |
| GSM1895987 | TAF15 | 58996_sort_peaks.narrowPeak.bed | 4.3306 | 6.19E-02 |

| **Supplemental Table S6.** Transcription factors significantly (p-value <0.05) enriched in the differentially interacting regions in HEK293 CTCF knockdown cells. See legend for Table 3. | | | |
| --- | --- | --- | --- |
| Transcription Factor | Number of experiments | Mean logFC | Stouffer-Liptak p-value |
| POLR2A | 32 | 2.5403 | 6.87E-68 |
| FOXM1 | 12 | 2.6438 | 1.38E-26 |
| XRN2 | 9 | 2.6961 | 1.77E-20 |
| TRIM28 | 8 | 3.1365 | 3.34E-18 |
| MYC | 9 | 3.674 | 1.07E-12 |
| CDK9 | 3 | 2.2834 | 4.33E-08 |
| CTCF | 3 | 2.7039 | 4.33E-08 |
| EP300 | 3 | 2.913 | 4.33E-08 |
| TET3 | 3 | 2.7027 | 4.33E-08 |
| BRD4 | 5 | 3.2043 | 6.64E-08 |
| ELK4 | 3 | 1.0881 | 8.45E-08 |
| WDR5 | 3 | 3.6028 | 8.45E-08 |
| BAHD1 | 3 | 3.1755 | 6.19E-06 |
| CREBBP | 2 | 2.7888 | 6.19E-06 |
| JMJD6 | 2 | 2.4619 | 6.19E-06 |
| NCOR1 | 2 | 3.2093 | 6.19E-06 |
| BRD1 | 4 | 3.2242 | 1.07E-05 |
| C17orf96 | 2 | 4.3094 | 1.16E-04 |
| RYBP | 2 | 0.5388 | 5.42E-04 |
| FANCD2 | 2 | 3.3978 | 7.63E-04 |
| EMX1 | 2 | 3.5324 | 7.82E-04 |
| BRD2 | 1 | 2.7475 | 9.99E-04 |
| BRD3 | 1 | 1.4877 | 9.99E-04 |
| CBX4 | 1 | 1.1606 | 9.99E-04 |
| DCP1A | 1 | 2.7263 | 9.99E-04 |
| DDX21 | 1 | 2.7353 | 9.99E-04 |
| DPPA2 | 1 | 3.1886 | 9.99E-04 |
| HCFC1 | 1 | 2.5906 | 9.99E-04 |
| PHF8 | 1 | 2.3149 | 9.99E-04 |
| SMC3 | 1 | 2.7747 | 9.99E-04 |
| TBL1X | 1 | 2.2675 | 9.99E-04 |
| TET2 | 1 | 3.0843 | 9.99E-04 |
| TTF2 | 1 | 2.6618 | 9.99E-04 |
| ZNF143 | 1 | 3.3148 | 9.99E-04 |
| ZNF263 | 1 | 2.9817 | 9.99E-04 |
| RNF2 | 2 | -0.374 | 1.15E-03 |
| BMI1 | 2 | 3.2265 | 4.97E-03 |
| C10orf12 | 2 | 4.3306 | 2.50E-02 |
| PCGF6 | 1 | 5.5337 | 3.10E-02 |
| AFF4 | 1 | 0.9309 | 3.50E-02 |

# References

Anders, Simon, and Wolfgang Huber. 2010. “Differential Expression Analysis for Sequence Count Data.” *Genome Biol* 11 (10): R106. doi:[10.1186/gb-2010-11-10-r106](https://doi.org/10.1186/gb-2010-11-10-r106).

Auer, Paul L, and R W Doerge. 2010. “Statistical Design and Analysis of Rna Sequencing Data.” *Genetics* 185 (2): 405–16. doi:[10.1534/genetics.110.114983](https://doi.org/10.1534/genetics.110.114983).

Baggerly, Keith A, Li Deng, Jeffrey S Morris, and C Marcelo Aldaz. 2004. “Overdispersed Logistic Regression for Sage: Modelling Multiple Groups and Covariates.” *BMC Bioinformatics* 5 (October): 144. doi:[10.1186/1471-2105-5-144](https://doi.org/10.1186/1471-2105-5-144).

Hansen, Kasper D, Zhijin Wu, Rafael A Irizarry, and Jeffrey T Leek. 2011. “Sequencing Technology Does Not Eliminate Biological Variability.” *Nat Biotechnol* 29 (7): 572–3. doi:[10.1038/nbt.1910](https://doi.org/10.1038/nbt.1910).

Kal, A J, A J van Zonneveld, V Benes, M van den Berg, M G Koerkamp, K Albermann, N Strack, et al. 1999. “Dynamics of Gene Expression Revealed by Comparison of Serial Analysis of Gene Expression Transcript Profiles from Yeast Grown on Two Different Carbon Sources.” *Mol Biol Cell* 10 (6): 1859–72.

Lu, Jun, John K Tomfohr, and Thomas B Kepler. 2005. “Identifying Differential Expression in Multiple Sage Libraries: An Overdispersed Log-Linear Model Approach.” *BMC Bioinformatics* 6 (June): 165. doi:[10.1186/1471-2105-6-165](https://doi.org/10.1186/1471-2105-6-165).

McCarthy, Davis J, Yunshun Chen, and Gordon K Smyth. 2012. “Differential Expression Analysis of Multifactor Rna-Seq Experiments with Respect to Biological Variation.” *Nucleic Acids Res* 40 (10): 4288–97. doi:[10.1093/nar/gks042](https://doi.org/10.1093/nar/gks042).

Rao, Suhas S P, Miriam H Huntley, Neva C Durand, Elena K Stamenova, Ivan D Bochkov, James T Robinson, Adrian L Sanborn, et al. 2014. “A 3d Map of the Human Genome at Kilobase Resolution Reveals Principles of Chromatin Looping.” *Cell* 159 (7): 1665–80. doi:[10.1016/j.cell.2014.11.021](https://doi.org/10.1016/j.cell.2014.11.021).

Rao, Suhas S. P., Su-Chen Huang, Brian Glenn St Hilaire, Jesse M. Engreitz, Elizabeth M. Perez, Kyong-Rim Kieffer-Kwon, Adrian L. Sanborn, et al. 2017. “Cohesin Loss Eliminates All Loop Domains.” *Cell* 171 (2). Elsevier: 305–320.e24. doi:[10.1016/j.cell.2017.09.026](https://doi.org/10.1016/j.cell.2017.09.026).

Robinson, Mark D, and Gordon K Smyth. 2007. “Moderated Statistical Tests for Assessing Differences in Tag Abundance.” *Bioinformatics* 23 (21): 2881–7. doi:[10.1093/bioinformatics/btm453](https://doi.org/10.1093/bioinformatics/btm453).

Robinson, Mark D, and Smyth, Gordon K. 2008. “Small-Sample Estimation of Negative Binomial Dispersion, with Applications to Sage Data.” *Biostatistics* 9 (2): 321–32. doi:[10.1093/biostatistics/kxm030](https://doi.org/10.1093/biostatistics/kxm030).

Robinson, Mark D, Davis J McCarthy, and Gordon K Smyth. 2010. “EdgeR: A Bioconductor Package for Differential Expression Analysis of Digital Gene Expression Data.” *Bioinformatics* 26 (1): 139–40. doi:[10.1093/bioinformatics/btp616](https://doi.org/10.1093/bioinformatics/btp616).

Tjur, Tue. 1998. “Nonlinear Regression, Quasi Likelihood, and Overdispersion in Generalized Linear Models.” *The American Statistician* 52 (3). [American Statistical Association, Taylor & Francis, Ltd.]: 222–27. <http://www.jstor.org/stable/2685928>.

Zuin, J., Dixon, J. R., van der Reijden, M. I., Ye, Z., Kolovos, P., Brouwer, R. W., van de Corput, M. P., van de Werken, H. J., Knoch, T. A., van IJcken, W. F., Grosveld, F. G., Ren, B., … Wendt, K. S. (2013). Cohesin and CTCF differentially affect chromatin architecture and gene expression in human cells. *Proceedings of the National Academy of Sciences of the United States of America*
